Development 135, 3611–3622 (2008) doi:10.1242/dev.025361

# *Frs2α*-deficiency in cardiac progenitors disrupts a subset of FGF signals required for outflow tract morphogenesis

Jue Zhang<sup>1</sup>, Yongshun Lin<sup>1</sup>, Yongyou Zhang<sup>1</sup>, Yongsheng Lan<sup>1</sup>, Chunhong Lin<sup>1</sup>, Anne M. Moon<sup>2</sup>, Robert J. Schwartz<sup>3</sup>, James F. Martin<sup>1</sup> and Fen Wang<sup>1,\*</sup>

The cardiac outflow tract (OFT) is a developmentally complex structure derived from multiple lineages and is often defective in human congenital anomalies. Although emerging evidence shows that fibroblast growth factor (FGF) is essential for OFT development, the downstream pathways mediating FGF signaling in cardiac progenitors remain poorly understood. Here, we report that FRS2 $\alpha$  (FRS2), an adaptor protein that links FGF receptor kinases to multiple signaling pathways, mediates crucial aspects of FGF-dependent OFT development in mouse. Ablation of *Frs2α* in mesodermal OFT progenitor cells that originate in the second heart field (SHF) affects their expansion into the OFT myocardium, resulting in OFT misalignment and hypoplasia. Moreover, *Frs2α* mutants have defective endothelial-to-mesenchymal transition and neural crest cell recruitment into the OFT cushions, resulting in OFT septation defects. These results provide new insight into the signaling molecules downstream of FGF receptor tyrosine kinases in cardiac progenitors.

**KEY WORDS:** Receptor tyrosine kinase, Cell signaling, Heart development, Second heart field, Mouse model

## INTRODUCTION

Congenital heart disease (CHD) represents the most common birth defect in humans, affecting nearly 1% of newborns. Since more than 30% of CHD patients have outflow tract (OFT) defects (Rosamond et al., 2007), understanding how OFT development is controlled at the molecular level is of great interest. The OFT initially develops as an unseptated myocardial tube lined with endothelial cells, the endocardium. The OFT myocardium comprises cells deployed from a population of mesodermal cells called the second heart field (SHF) that resides in the pharyngeal and splanchnic mesoderm (SM), after formation of the primary heart tube (Buckingham et al., 2005; Srivastava, 2006). The OFT then undergoes dramatic remodeling and is divided into the right ventricular/pulmonary and left ventricular/aortic outflows at the arterial pole by the fusion and remodeling of the OFT cushions (Lamers and Moorman, 2002). This process is crucial for separating the pulmonary and systemic circulations postnatally. First, OFT myocardial cells secrete extracellular matrix molecules to form the OFT cushions. Subsequently, the matrix is invaded by cells from two sources: OFT endocardial cells that undergo an endothelial-to-mesenchymal transition (EMT) and neural crest cells (NCCs) that migrate from pharyngeal arches 3, 4 and 6. Disruption of the endocardial EMT or the contribution of NCCs to the OFT cushions can cause OFT defects (Armstrong and Bischoff, 2004; Hutson and Kirby, 2003; Moon et al., 2006).

The FGF family of regulatory polypeptides controls a broad spectrum of cellular processes during development and through adulthood (Eswarakumar et al., 2005; McKeehan et al., 1998).

Emerging evidence demonstrates that several FGF ligands are involved in OFT development. *Fgf8* and *Fgf10* have been shown to be expressed in a temporally and spatially specific manner in the SHF progenitor cells residing in the SM and pharyngeal mesoderm core. *Fgf8* is also expressed in the pharyngeal ectoderm and endoderm. *Fgf15* is expressed in the pharyngeal endoderm (PE) and pharyngeal mesenchyme. Tissue-specific ablation of *Fgf8* disrupts OFT remodeling, resulting in alignment and septation defects (Ilagan et al., 2006; Park et al., 2006). *Fgf15* loss-of-function also causes OFT alignment defects (Vincentz et al., 2005). Furthermore, the FGF signaling axis genetically interacts with *Tbx1* pathways that regulate the development of OFT and pharyngeal arch derivatives in a tissue-specific manner (Aggarwal et al., 2006; Vitelli et al., 2006). Disruption of *Tbx1* function is linked to DiGeorge and other syndromes associated with the microdeletion of chromosome 22q11.2 (Lindsay et al., 2001).

The FGFs exert their regulatory activity by activating FGF receptor (FGFR) tyrosine kinases, which are encoded by four highly homologous genes, in partnership with peri-cellular matrix heparan sulfate proteoglycans (McKeehan et al., 1998; Ornitz, 2000). Thus far, only a few intracellular signaling molecules have been shown to bind to FGFRs directly. These include phospholipase C $\gamma$  (Mohammadi et al., 1992; Peters et al., 1992), CRK (Larsson et al., 1999), CRKL (Moon et al., 2006), FRS2 $\alpha$  (FRS2; SNT1) and FRS2 $\beta$  (FRS3; SNT2) (Kouhara et al., 1997; Ong et al., 1996). FRS2 $\alpha$  is a proximal-interactive adaptor protein that has six tyrosine phosphorylation sites that are phosphorylated by FGFRs upon activation by FGF ligands. Among them, phosphorylated Y196, Y306, Y349 and Y392 are GRB2 binding sites that link FGFR kinases to the PI3 kinase pathway; phosphorylated Y436 and Y471 are SHP2 (PTPN11 – Mouse Genome Informatics) binding sites that link FGFR kinases to the MAP kinase pathway (Kouhara et al., 1997; Ong et al., 2000; Zhang et al., 2008). Deleting the FRS2 $\alpha$ -binding VT (valine and threonine) dipeptide motif in the intracellular juxtamembrane domain of FGFR1 in mice leads to defects in multiple organs (Hoch and Soriano, 2006). In addition to FGFRs, several other receptor tyrosine kinases have been reported

<sup>1</sup>Center for Cancer and Stem Cell Biology and <sup>3</sup>Center for Molecular Development and Disease, Institute of Biosciences and Technology, Texas A&M Health Science Center, 2121 W. Holcombe Boulevard, Houston, TX 77030, USA. <sup>2</sup>Department of Pediatrics and Neurobiology and Anatomy, University of Utah School of Medicine, Salt Lake City, Utah 84112, USA.

\*Author for correspondence (e-mail: fwang@ibt.tmc.edu)

to phosphorylate FRS2 $\alpha$ , although the roles of FRS2 $\alpha$  in these signaling pathways remain poorly defined (Avery et al., 2007; Ong et al., 2000).

*Frs2 $\alpha$*  is expressed in mouse embryos during early embryogenesis and almost ubiquitously in all fetal and adult tissues (McDougall et al., 2001). Complete disruption of *Frs2 $\alpha$*  function abrogates FGF-induced activation of MAP and PI3 kinases, chemotactic responses and cell proliferation, and also causes lethality at embryonic day (E) 7-7.5 (Hadari et al., 2001). Mice carrying mutations in the two SHP2 binding sites exhibit a variety of developmental defects in many organs, whereas mice carrying mutations in the four GRB2 binding sites generally have less severe phenotypes (Yamamoto et al., 2005).

In order to circumvent the early embryonic lethality resulting from *Frs2 $\alpha$*  ablation and to examine the roles of FRS2 $\alpha$ -mediated signals in heart morphogenesis, we employed the Cre-loxP recombination system to tissue-specifically inactivate *Frs2 $\alpha$*  alleles in heart progenitor cells. Ablation of *Frs2 $\alpha$*  in the SHF caused OFT misalignment, including overriding aorta (OA) and double-outlet right ventricle (DORV), by compromising SHF progenitor cell proliferation and thereby reducing the contribution of the SHF-derived mesodermal cells to the OFT myocardium. In addition, ablation of *Frs2 $\alpha$*  in the OFT myocardium increased VEGF expression and disrupted endocardial EMT. Deletion of *Frs2 $\alpha$*  in the SHF and PE reduced *Bmp4* expression and disrupted NCC invasion of the OFT cushions, resulting in persistent truncus arteriosus (PTA), a severe OFT septation defect. Furthermore, double ablation of *Fgfr1* and *Fgfr2* phenocopied ablation of *Frs2 $\alpha$* . The results suggest that FRS2 $\alpha$ -mediated signals in OFT myocardial cells promote endocardial EMT by downregulating VEGF expression, whereas in SM and PE, the FRS2 $\alpha$ -mediated signals upregulate BMP4 expression and promote the NCC contribution to the OFT. Together, the results delineate a molecular mechanism of how FGF elicits tissue-specific signals to regulate OFT development.

## MATERIALS AND METHODS

### Animals

All animals were housed in the Program for Animal Resources of the Institute of Biosciences and Technology, Texas A&M Health Science Center, and all experimental procedures were approved by the Institutional Animal Care and Use Committee. The mice carrying *Frs2 $\alpha$ <sup>fllox</sup>*, *Fgfr1<sup>fllox</sup>*, *Fgfr2<sup>fllox</sup>*, *Nkx2.5<sup>Cre</sup>* knock-in alleles and *Mef2c<sup>Cre</sup>*, *Wnt1<sup>Cre</sup>* and *Tie2<sup>Cre</sup>* (*Tie2* is also known as *Tek* – Mouse Genome Informatics) transgenic alleles were bred and genotyped as described (Danielian et al., 1998; Kisanuki et al., 2001; Lin, Y. et al., 2007; Moses et al., 2001; Trokovic et al., 2003; Verzi et al., 2005; Yu et al., 2003). All mice were on a mixed background (including C57/BL6, SV129 and ICR) and all embryos arising from each cross were outbred. The hearts were excised at the stages indicated in the text, fixed with 4% paraformaldehyde (PFA) in PBS for 4 hours and paraffin embedded. The sections were rehydrated and stained with Hematoxylin and Eosin for histological analysis.

### Immunostaining

Immunostaining was performed on 5- $\mu$ m sections mounted on Superfrost Plus slides (Fisher Scientific, Pittsburgh, PA). The antigens were retrieved by incubation in citrate buffer (10 mM) for 20 minutes at 100°C or as suggested by manufacturers of the antibodies. The source and concentration of primary antibodies are: mouse anti-AP2 $\alpha$  (1:10 dilution) and anti-ISL1 (1:500) from Development Studies Hybridoma Bank; anti-phosphorylated ERK (1:100), anti-phosphorylated AKT (1:100) and anti-phosphorylated SMAD1/5/8 (1:500) from Cell Signaling (Danvers, MA); anti-FRS2 $\alpha$  (1:100), anti-NFATC1 (1:100), anti-phosphorylated histone H3 (1:100), anti-VEGFA (1:100) and anti-PECAM (1:100) from Santa Cruz (Santa Cruz, CA). The specifically bound antibodies were detected with HRP-conjugated secondary antibody (Bio-Rad, Hercules, CA) and visualized using TSA Plus

Fluorescence Systems from Perkin Elmer (Boston, MA) on a Zeiss LSM 510 confocal microscope. For TUNEL assays, tissues were fixed and sectioned, and the apoptotic cells were detected with the ApopTag Peroxidase In Situ Kit from Chemicon (Temecula, CA).

### In situ hybridization

Whole-mount in situ hybridization was performed as previously described (Edmondson et al., 1994). Briefly, after fixation in 4% PFA in PBS overnight, embryos were treated with 10  $\mu$ g/ml protease K for 5-15 minutes at room temperature, and post-fixed with 4% PFA in PBS for 20 minutes. After prehybridization at 70°C for 2 hours, the hybridization was carried out by overnight incubation at 70°C. Following the hybridization, embryos were washed with TBST [0.25 M Tris-HCl-buffered saline (pH 7.5), 0.01% Triton X-100, 2 mM levamisole], blocked with 10% sheep serum in TBST, and then rocked overnight at 4°C in a 1:4000 dilution of alkaline phosphatase-conjugated anti-digoxigenin antibody (Roche, Indianapolis, IN) in blocking buffer. After eight washes with TBST, specifically bound antibodies were visualized by alkaline phosphatase staining. The embryos were fixed post-hybridization with 4% PFA in PBS. At least three mutants and three control embryos were analyzed for each probe.

### Short-term mouse embryo culture

Short-term mouse embryo culture was performed as described previously (Grego-Bessa et al., 2007). Briefly, E8.5 mouse embryos were dissected in PBS and cultured in 12-well plates containing 1% agarose to avoid embryo attachment; 1 ml DMEM medium containing 50% FBS and antibiotics (penicillin and streptomycin, 100 U/ml each) was added on top of the agarose. Inhibitors for phosphorylated ERK and PI3K (LY294002, Calbiochem, Darmstadt, Germany) were added to the media to a final concentration of 10  $\mu$ M. Embryos were cultured in a 5% CO<sub>2</sub> incubator at 37°C for 16 hours. The embryos were then dissected in PBS and then fixed in 4% PFA in PBS for further analyses.

## RESULTS

### Ablation of *Frs2 $\alpha$* in the second heart field and pharyngeal endoderm

Expression of *Frs2 $\alpha$*  in the cardiac mesoderm could be detected as early as the 0-somite stage (ss) by immunostaining (Fig. 1A). To investigate FRS2 $\alpha$  function in heart development, we ablated *Frs2 $\alpha$*  in cardiac progenitors by crossing mice bearing the *Frs2 $\alpha$*  conditional null (*Frs2 $\alpha$ <sup>fllox</sup>*) allele (Lin, Y. et al., 2007) with mice carrying the *Nkx2.5<sup>Cre</sup>* knock-in allele (Moses et al., 2001) or the *Mef2c<sup>Cre</sup>* transgene (Verzi et al., 2005). *Nkx2.5<sup>Cre</sup>* is expressed at the 0 ss and directs Cre activity in the first heart field (FHF), SHF and the PE. *Mef2c<sup>Cre</sup>* is active at the 0-1 ss in the specified SHF, but not in the FHF and PE.

At E9.5, *Frs2 $\alpha$*  was highly expressed in the PE and SM (Fig. 1Ba). In *Nkx2.5<sup>Cre</sup>;Frs2 $\alpha$ <sup>fllox</sup>* embryos (designated *Frs2 $\alpha$ <sup>cn/Nkx</sup>*), *Frs2 $\alpha$*  expression was efficiently disrupted in the OFT myocardium and endocardium, SM and PE, as well as in the atrial and ventricular myocardium of E9.5 embryos (Fig. 1Bb). In *Mef2c<sup>Cre</sup>;Frs2 $\alpha$ <sup>fllox</sup>* embryos (designated *Frs2 $\alpha$ <sup>cn/Mef</sup>*), disruption of *Frs2 $\alpha$*  expression was complete in the SM, OFT myocardium and right ventricle myocardium (Fig. 1Bc), and mosaicly in the OFT endocardium. Detailed timecourse analyses showed that the FRS2 $\alpha$  protein level was significantly reduced by the 8-9 ss in *Frs2 $\alpha$ <sup>cn/Nkx</sup>* embryos, and by the 11-12 ss in *Frs2 $\alpha$ <sup>cn/Mef</sup>* embryos (see Fig. S1 in the supplementary material), which is consistent with the relatively delayed activity of the *Mef2c<sup>Cre</sup>* driver (Verzi et al., 2005). Together, these data indicate that the *Frs2 $\alpha$ <sup>cn/Nkx</sup>* embryos had an efficient and widespread *Frs2 $\alpha$*  deletion, whereas the *Frs2 $\alpha$ <sup>cn/Mef</sup>* embryos had a more restricted and delayed *Frs2 $\alpha$*  deletion. These two conditional mutants provided an opportunity to dissect the tissue-specific roles of FRS2 $\alpha$  in the OFT.

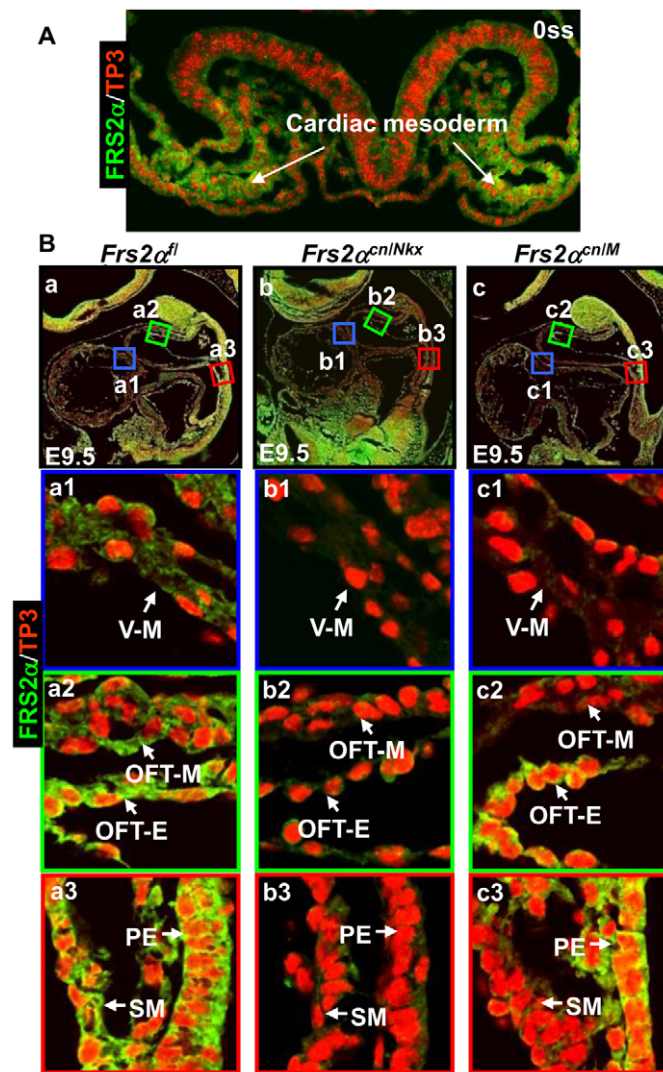

**Fig. 1. Diminished *Frs2 $\alpha$*  expression in *Frs2 $\alpha$ <sup>cn</sup>* outflow tract and second heart field.** Expression of *Frs2 $\alpha$*  in (A) 0-somite stage (ss) or (B) E9.5 mouse embryos was assessed by immunostaining with anti-FRS2 $\alpha$  antibody (green) on paraffin sections. Nuclei were stained with To-Pro3 (a DNA stain, red). a1-3, b1-3 and c1-3 are high-magnification views of the boxed areas in a, b and c, respectively. Note that in *Frs2 $\alpha$ <sup>cn/Nkx</sup>* mutants, *Frs2 $\alpha$*  expression was diminished in ventricular myocardium (V-M), outflow tract myocardium (OFT-M), endocardium (OFT-E), pharyngeal endoderm (PE) and splanchnic mesoderm (SM). In *Frs2 $\alpha$ <sup>cn/Mef</sup>* mutants, *Frs2 $\alpha$*  expression was disrupted in V-M, OFT-M and SM, but was intact in the OFT-E and PE. f, floxed allele.

### The two classes of *Frs2 $\alpha$* conditional mutant have disrupted OFT morphogenesis

The majority of *Frs2 $\alpha$ <sup>cn/Nkx</sup>* or *Frs2 $\alpha$ <sup>cn/Mef</sup>* embryos died neonatally with severe OFT malformations (Tables 1-3). The few surviving neonates died within 3 weeks after birth. We examined hearts from E14.5 fetuses and found that both *Frs2 $\alpha$ <sup>cn/Nkx</sup>* and *Frs2 $\alpha$ <sup>cn/Mef</sup>* hearts exhibited OFT alignment defects, including OA (Fig. 2A-C) and DORV (Fig. 2D-F). Frequently, the *Frs2 $\alpha$ <sup>cn/Nkx</sup>* OFT was completely unseptated or partially septated into aorta and pulmonary artery (Fig. 2H), which is classified as PTA. By contrast, none of the *Frs2 $\alpha$ <sup>cn/Mef</sup>* fetuses exhibited septation defects, suggesting that FRS2 $\alpha$ -mediated signaling in the OFT myocardium and SM within the *Mef2c<sup>Cre</sup>* lineage is not obligatory for OFT septation.

In addition to the OFT myocardium and SHF, *Nkx2.5<sup>Cre</sup>* also mediated *Frs2 $\alpha$*  ablation in the OFT endocardium (Fig. 1Bb2) and the PE (Fig. 1Bb3), suggesting that FRS2 $\alpha$ -mediated signals in the PE and OFT endocardium are required for OFT septation. However, ablation of *Frs2 $\alpha$*  in the OFT endocardium with *Tie2<sup>Cre</sup>* (Kisanuki et al., 2001) did not disrupt OFT morphogenesis (see Fig. S2 in the supplementary material). Therefore, the results suggest that FRS2 $\alpha$ -mediated events in the PE, but not the endocardium, are required for OFT septation. Since *Nkx2.5<sup>Cre</sup>* is expressed slightly earlier than *Mef2c<sup>Cre</sup>*, the different OFT phenotypes in the *Frs2 $\alpha$ <sup>cn/Nkx</sup>* and *Frs2 $\alpha$ <sup>cn/Mef</sup>* mutants also suggest that the need for FRS2 $\alpha$ -mediated signals in OFT septation occurs early in the SHF. Although *Nkx2.5<sup>Cre</sup>* knock-in mice have no OFT defect (Moses et al., 2001), the data do not rule out the possibility that the phenotype in *Frs2 $\alpha$ <sup>cn/Nkx</sup>* OFT is a synergistic effect of FRS2 $\alpha$  deficiency and *Nkx2.5* haploid insufficiency.

### Impaired SHF patterning and compromised activation of the MAP kinase pathway in the *Frs2 $\alpha$* mutant SHF and OFT

During early OFT development, cells are deployed from the SHF to the OFT starting at ~E8.25; ablation of the SHF in chicken embryos has been shown to cause OFT misalignment (Ward et al., 2005). The SHF is the common domain of *Nkx2.5<sup>Cre</sup>*- and *Mef2c<sup>Cre</sup>*-mediated ablation, and the common OFT misalignment phenotypes in these two mutant classes suggest that FRS2 $\alpha$ -mediated signals in the SHF promote the progenitor cells residing in the SHF to contribute to the OFT myocardium. To test this possibility, immunostaining was employed to assess the number of cells expressing ISL1, a transcription factor that is expressed in the SHF and PE and which is crucial for the ability of these progenitor cells to proliferate and ultimately contribute to the OFT (Cai et al., 2003; Park et al., 2006).

Both *Frs2 $\alpha$ <sup>cn/Nkx</sup>* and *Frs2 $\alpha$ <sup>cn/Mef</sup>* embryos had a reduction in ISL1<sup>+</sup> cells in the distal OFT myocardium at E9.5; *Frs2 $\alpha$ <sup>cn/Nkx</sup>* embryos also had fewer ISL1<sup>+</sup> cells in the OFT endocardium (see Fig. S3 in the supplementary material). To test whether the decrease in ISL1<sup>+</sup> cells was due to a proliferation defect, double staining for phospho-histone H3 (pHH3) and ISL1 was carried out at the 11-12 ss (E8.5). The results revealed that the numbers of total ISL1<sup>+</sup> cells and proliferating ISL1<sup>+</sup> cells were both significantly reduced in the OFT and SM/SHF of *Frs2 $\alpha$ <sup>cn/Nkx</sup>* and *Frs2 $\alpha$ <sup>cn/Mef</sup>* mutants (Fig. 3A). Consistently, both *Frs2 $\alpha$ <sup>cn/Nkx</sup>* and *Frs2 $\alpha$ <sup>cn/Mef</sup>* OFTs were shorter than those of the controls (Fig. 3Ba-d). Lineage tracing with the *R26R-lacZ* reporter revealed that the  $\beta$ -galactosidase-stained tissue in *Frs2 $\alpha$ <sup>cn/Mef</sup>* hearts was smaller than that in the heterozygous littermates (Fig. 3Be,f), suggesting that the contribution of the *Frs2 $\alpha$* -deficient SHF to the

**Table 1. Survival analysis of *Frs2 $\alpha$ <sup>cn/Nkx</sup>* embryos and postnatal pups**

| Age       | Total | <i>Frs2<math>\alpha</math><sup>cn/Nkx</sup></i> | Expected |
|-----------|-------|-------------------------------------------------|----------|
| E8.5-17.5 | 986   | 247                                             | 247      |
| Postnatal | 186   | 33*                                             | 47       |

\*Twenty died perinatally, six died neonatally, seven survived for more than 2 weeks.

**Table 2. Survival analysis of *Frs2 $\alpha$ <sup>cn/Mef</sup>* embryos and postnatal pups**

| Age       | Total | <i>Frs2<math>\alpha</math><sup>cn/Mef</sup></i> | Expected |
|-----------|-------|-------------------------------------------------|----------|
| E8.5-17.5 | 265   | 62                                              | 66       |
| Postnatal | 44    | 4                                               | 11       |

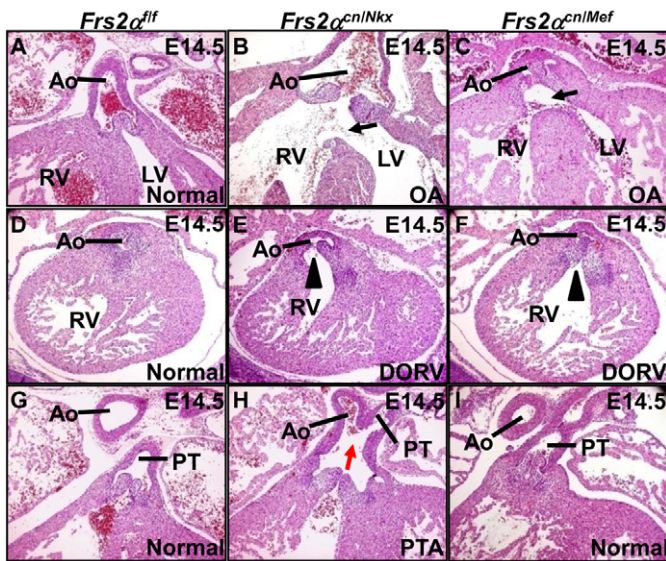

**Fig. 2. OFT alignment and septation defects in *Frs2α*<sup>n</sup> mutants.** H&E staining of E14.5 mouse embryonic heart sections demonstrates overriding aorta (A–C) and double-outlet right ventricle (D–F) defects in *Frs2α*<sup>cn/Nkx</sup> and *Frs2α*<sup>cn/Mef</sup> mutants, and persistent truncus arteriosus defects in the *Frs2α*<sup>cn/Nkx</sup> mutant (G–I). Ao, aorta; DORV, double-outlet right ventricle; LV, left ventricle; OA, overriding aorta; RV, right ventricle; PT, pulmonary trunk; PTA, persistent truncus arteriosus. Black arrows denote OA-associated ventricular septal defects; red arrow denotes the PTA; arrowheads denote DORV.

OFT and right ventricle was compromised. No clear difference in apoptosis was observed in the SM/SHF of *Frs2α*<sup>cn/Nkx</sup> or *Frs2α*<sup>cn/Mef</sup> embryos, although we detected increased apoptosis in the PE of *Frs2α*<sup>cn/Nkx</sup> embryos (see Fig. S4 in the supplementary material). Together, the results suggest that the shared alignment defects in these two classes of mutants result from proliferation defects in the SHF.

Since FRS2α has multiple tyrosine phosphorylation sites that link the MAP kinase and PI3K/AKT pathways to FGFR kinases (Kouhara et al., 1997; Ong et al., 2000), we used immunostaining to investigate which FRS2α-mediated downstream signaling pathway was interrupted in the mutant mice. Less phosphorylated ERK (MAPK) was detected in the OFT, SM and PE of *Frs2α*<sup>cn/Nkx</sup> embryos at the 11–12 ss, and in the OFT and SM of *Frs2α*<sup>cn/Mef</sup> embryos at the same stage (Fig. 3Ca–c). No significant difference was observed in anti-phosphorylated AKT staining at the same stage (Fig. 3Cd–f). Consistent with these findings, treating cultured E8.5 embryos with an ERK1/2 (MAPK3/1 – Mouse Genome Informatics), but not a PI3K/AKT, inhibitor significantly reduced the number of ISL1<sup>+</sup> cells in the SM, PE and OFT (Fig. 3Da–c), although both inhibitors effectively and specifically inhibited ERK1/2 and AKT phosphorylation, respectively (Fig. 3Dd). These data indicate that the MAP kinase, but not the PI3K/AKT, pathway is essential for the correct behavior of SHF cells. The data are consistent with a previous report that the number of ISL1<sup>+</sup> cells in the SHF is rapidly reduced after *Fgf8* ablation in the SHF (Park et

al., 2006). PITX2 is a homeobox transcription factor essential for OFT rotation and alignment (Ai et al., 2006). Whole-mount in situ hybridization showed that expression of *Pitx2* was unchanged in *Frs2α*<sup>cn/Nkx</sup> and *Frs2α*<sup>cn/Mef</sup> hearts (see Fig. S5 in the supplementary material), suggesting that the alignment defects in these mutants are not the result of altered *Pitx2* expression.

### Impaired cushion development in *Frs2α*<sup>cn/Nkx</sup> OFT is a compound result of defects in endocardial EMT and NCC invasion

OFT cushion formation and remodeling is a major process in OFT septation. Hematoxylin and Eosin (H&E) staining revealed that cellularity was reduced in both the proximal and distal segments of *Frs2α*<sup>cn/Nkx</sup>, but not *Frs2α*<sup>cn/Mef</sup>, OFT cushions at E10.5 (Fig. 4A,B). At E11.5, the OFT cushions were hypoplastic and failed to fuse at the distal part (Fig. 4C). The results suggest that both EMT and NCC invasion were affected in *Frs2α*<sup>cn/Nkx</sup> embryos and that these collectively contribute to the OFT septation defect.

PECAM (PECAM1) and NFATC1 are expressed in the endocardium. Downregulation of PECAM in the endocardium is a prerequisite for the EMT (Enciso et al., 2003). Immunostaining with anti-PECAM and anti-NFATC1 revealed that both PECAM and NFATC1 were present in the endocardium of control and *Frs2α*<sup>cn/Mef</sup> OFT, and were diminished after the cells underwent EMT and invaded the cushion. By contrast, expression of PECAM and NFATC1 was sustained in *Frs2α*<sup>cn/Nkx</sup> endocardial cells even after the cells had invaded the OFT cushion (Fig. 4D). This indicates that although some cells were successfully activated and could invade the matrix, they failed to complete EMT. Ex vivo culture experiments with E9.5 OFTs further demonstrated the EMT defects in the *Frs2α*<sup>cn/Nkx</sup> myocardium (Fig. 4E). Interestingly, ablation of *Frs2α* alleles in the OFT endocardium with *Tie2*<sup>Cre</sup> did not cause EMT and OFT defects (see Fig. S2 in the supplementary material), suggesting that FRS2α-mediated signals in the OFT endocardium are not essential for the EMT and that FRS2α-mediated signals regulate OFT endocardial EMT indirectly.

Given that OFT endocardial EMT is critically dependent on signaling molecules secreted by the OFT myocardium (Armstrong and Bischoff, 2004), and that the quantity of FRS2α protein is diminished in the SHF and in the forming OFT myocardium at the 8–9 ss in *Frs2α*<sup>cn/Nkx</sup>, but not *Frs2α*<sup>cn/Mef</sup>, mutants (see Fig. S1 in the supplementary material), it is likely that FRS2α-mediated signals in the myocardial precursors are required upstream of the myocardial signaling cascade that initiates and supports endocardial EMT before the 8–9 ss.

We found increased immunostaining for VEGFA in the *Frs2α*<sup>cn/Nkx</sup>, but not the *Frs2α*<sup>cn/Mef</sup>, OFT myocardium (Fig. 4F), which is consistent with a report that overexpression of VEGFA prevents nascent cushion endothelial cells from undergoing the EMT (Armstrong and Bischoff, 2004). It has been shown that myocardial NFATC2/3/4 promote EMT by suppressing VEGFA expression (Chang et al., 2004). An in vitro assay of mouse embryonic fibroblasts revealed that the transcriptional activity of NFAT is regulated by FGF in an FRS2α-dependent manner (Fig. 4G). These results suggest that FRS2α-mediated signals in the

**Table 3. Comparison of cardiovascular defects (E14.5–P1)**

| Type of defect | <i>Frs2α</i> <sup>cn/Nkx</sup> (n=29) | <i>Frs2α</i> <sup>cn/Mef</sup> (n=12) | <i>Fgfr1</i> <sup>cn/Nkx</sup> (n=14) | <i>Fgfr2</i> <sup>cn/Nkx</sup> (n=8) | <i>Fgfr1/r2</i> <sup>cn/Nkx</sup> (n=7) |
|----------------|---------------------------------------|---------------------------------------|---------------------------------------|--------------------------------------|-----------------------------------------|
| OA or DORV     | 16                                    | 5                                     | 0                                     | 3                                    | 5                                       |
| TA             | 11                                    | 0                                     | 0                                     | 0                                    | 4                                       |
| VSD            | 19                                    | 3                                     | 1                                     | 5                                    | 6                                       |

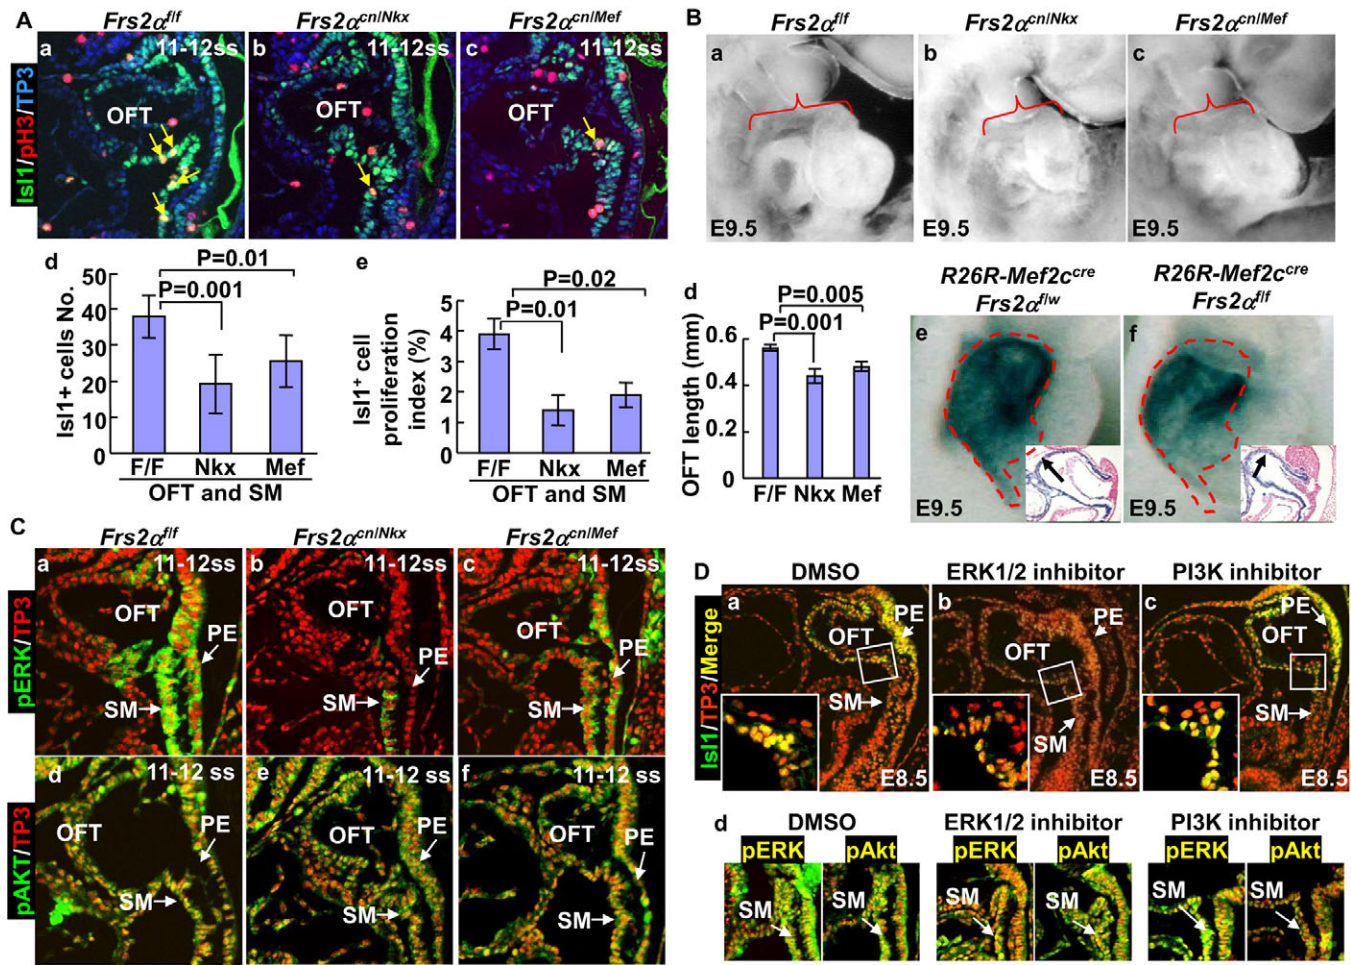

**Fig. 3. Ablation of *Frs2 $\alpha$*  compromises expansion of SHF progenitor cells to the OFT myocardium.** (A) Sections from *Frs2 $\alpha$ <sup>fl/fl</sup>* (a) *Frs2 $\alpha$ <sup>cn/Nkx</sup>* (b) and *Frs2 $\alpha$ <sup>cn/Mef</sup>* (c) mouse embryos immunostained with anti-ISL1 (green) and anti-phosphorylated histone H3 (red) antibodies. Nuclei were counterstained with To-Pro3 (blue). The total and proliferating ISL1<sup>+</sup> cell numbers in the OFT and SM from four individuals are shown in d,e (mean  $\pm$  s.d.). (B) Reduced OFT length and SHF lineage in *Frs2 $\alpha$*  mutants (a-c). The OFT lengths at E9.5 as measured from six individuals are presented in d (mean  $\pm$  s.d.). (e,f) X-Gal staining. The blue staining represents cells from SHF progenitors in which the *R26R* reporter was activated. The outline of the X-Gal-stained area in the control (e) has been superimposed on the mutant (f) to better illustrate the difference. Insets are sections from the same tissues demonstrating OFT myocardium derived from the *Mef2c<sup>Cre</sup>* lineage (black arrows). (C) Compromised ERK1/2, but not AKT, phosphorylation in the *Frs2 $\alpha$ <sup>cn/Nkx</sup>* OFT and SM. Embryo sections were immunostained with anti-phosphorylated ERK1/2 (a-c) or phosphorylated AKT (d-f) antibodies (green). Nuclei were counterstained with To-Pro3 (red). (D) Inhibition of the MAP kinase, but not the PI3K/AKT, pathway reduces the contribution of ISL1<sup>+</sup> cells to the OFT. (a-c) Short-term (24 hour) cultures of E8.5 embryos were sectioned and stained by anti-ISL1 antibody (green) and To-Pro3 (red). Insets are high-magnification views of the same sections. (d) Cultured E8.5 embryos were treated with ERK1/2 or PI3K inhibitors as indicated. Adjacent sections from the same embryos were immunostained with anti-phosphorylated ERK1/2 or AKT (green) and with To-Pro3 (red), demonstrating the specificity and efficacy of the ERK1/2 and PI3K inhibitors. w, wild-type allele.

OFT myocardium repress VEGFA expression and promote the OFT endocardial EMT, probably through regulating the transcriptional activity of NFAT. No defects were found in the atrioventricular (AV) cushions of either *Frs2 $\alpha$ <sup>cn/Nkx</sup>* or *Frs2 $\alpha$ <sup>cn/Mef</sup>* hearts (see Fig. S6 in the supplementary material). It is possible that FRS2 $\alpha$ -mediated signals do not regulate AV cushion formation, or that other pathways redundantly regulate the process, as the AV canal also consists of cells from other lineages (Galli et al., 2008; Hutson et al., 2006; Liao et al., 2004).

Because NCCs make crucial contributions to the distal OFT cushions, we examined migrating NCCs at E9.5 by immunostaining with anti-AP2 $\alpha$  (TCFAP2 $\alpha$  – Mouse Genome Informatics) antibody, which labels migrating NCCs and the ectoderm. The results showed that the number of migrating NCCs

(AP2 $\alpha$ <sup>+</sup>) in pharyngeal arches 3 and 4/6 and around the aortic sac in *Frs2 $\alpha$ <sup>cn/Nkx</sup>* embryos was reduced (Fig. 5A,B). By contrast, no change in the number of migrating NCCs was detected in *Frs2 $\alpha$ <sup>cn/Mef</sup>* embryos. Co-immunostaining with anti-AP2 $\alpha$  and anti-pHH3 antibodies revealed significantly decreased proliferation in AP2 $\alpha$ <sup>+</sup> cells of *Frs2 $\alpha$ <sup>cn/Nkx</sup>* embryos (Fig. 5C,D). We did not detect an increase in apoptosis in NCCs of *Frs2 $\alpha$ <sup>cn/Nkx</sup>* embryos at E10.5 (see Fig. S4 in the supplementary material). These data suggest that the reduced number of NCCs in the OFT is a result of defective NCC proliferation, although NCC migration might also be affected. These defects are not attributable to *Frs2 $\alpha$*  loss-of-function in NCCs because the *Nkx2.5<sup>Cre</sup>* expression domain does not include the neural crest (Moses et al., 2001). Furthermore, ablation of *Frs2 $\alpha$*  in NCCs with *Wnt1-Cre* (Danielian et al., 1998)

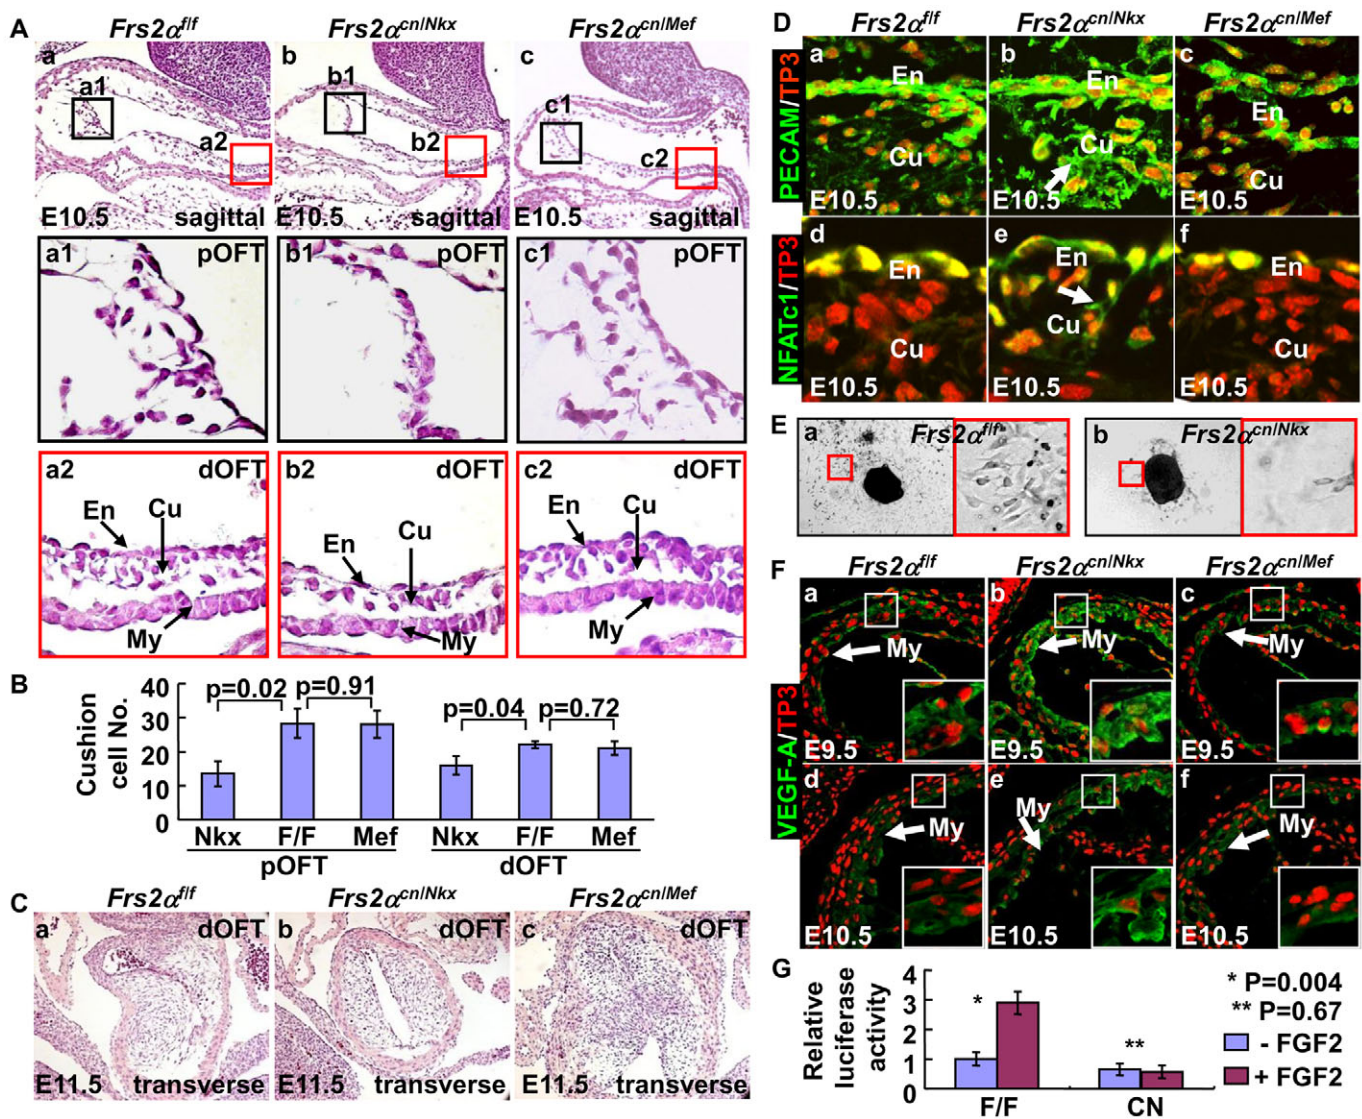

**Fig. 4. Ablation of *Frs2α* disrupts OFT cushion formation by inhibiting endocardial EMT and NCC contribution.** (A,B) Reduced cellularity in *Frs2α* mutant OFT cushions. (A) Sagittal sections of E10.5 mouse embryos were H&E stained. High-magnification views of boxed areas representing proximal and distal OFT are shown as indicated (a1-c2). (B) Cell numbers in the proximal and distal cushions (Cu) were assessed and statistical data from four individuals are presented (mean  $\pm$  s.d.). Note that *Frs2α<sup>cn/Nkx</sup>*, but not *Frs2α<sup>cn/Mef</sup>*, OFT cushions had decreased cellularity. En, endocardium. (C) H&E staining of transverse sections of E11.5 distal OFT showing the fusion defect in *Frs2α<sup>cn/Nkx</sup>* (b) OFT cushions. (D) Immunostaining for PECAM (a-c) and NFATC1 (d-f) shows compromised EMT in the *Frs2α<sup>cn/Nkx</sup>* proximal OFT cushions. Note that both PECAM and NFATC1 are still expressed in *Frs2α<sup>cn/Nkx</sup>* cushion cells (arrows). (E) Ex vivo culture of E9.5 OFTs shows compromised EMT in *Frs2α<sup>cn</sup>* (b) OFT myocardium. (F) Increased immunostaining for VEGFA in the *Frs2α<sup>cn/Nkx</sup>* OFT myocardium (My). Expression of VEGFA in E9.5 (a-c) and E10.5 (d-f) embryos. Nuclei were stained with To-Pro3. Boxed insets are high-magnification views of the myocardium. Note that VEGF expression in *Frs2α<sup>cn/Nkx</sup>* myocardial cells is significantly increased. (G) *Frs2α* is essential for FGF2 to activate NFAT transcriptional activity. Mouse embryonic fibroblasts carrying homozygous *Frs2α<sup>lox</sup>* alleles were transfected with an NFAT-dependent luciferase reporter with or without Cre coexpression. The cells were cultured in the presence or absence of 2 ng/ml FGF2 as indicated. Luciferase activity was then assessed. Data are mean  $\pm$  s.d. of triplicate samples.

did not cause OFT defects (data not shown). These findings indicate that *FRS2α*-mediated signals in NCCs are not required for NCC deployment and that the loss of *FRS2α*-mediated signals from the SM and/or PE causes secondary defects in the ability of NCCs to contribute to the OFT.

BMPs from the OFT myocardium, SM and PE control NCC patterning (Liu et al., 2004; Ma et al., 2005; Stottmann et al., 2004), and their expression is positively regulated by FGFs (Choi et al., 2005; Gotoh et al., 2005). Whole-mount in situ hybridization demonstrated that *Bmp4* expression was reduced in the OFT, SM

and PE of *Frs2α<sup>cn/Nkx</sup>* embryos (Fig. 6Ah,k). By contrast, after ablation of *Frs2α* with *Mef2c<sup>Cre</sup>*, *Bmp4* expression was reduced in the OFT and SM, but not in the PE (Fig. 6A). Consistently, phosphorylation of SMAD1/5/8, which are downstream targets of the BMP receptor, was reduced in the same domains (Fig. 6B). These data suggest that in *Frs2α<sup>cn/Mef</sup>* embryos, the net level of BMP signaling in the pharynx and OFT, although decreased, is sufficient to support NCC proliferation and migration into the OFT cushions, whereas in *Frs2α<sup>cn/Nkx</sup>* mutants, BMP signaling falls below a critical threshold.

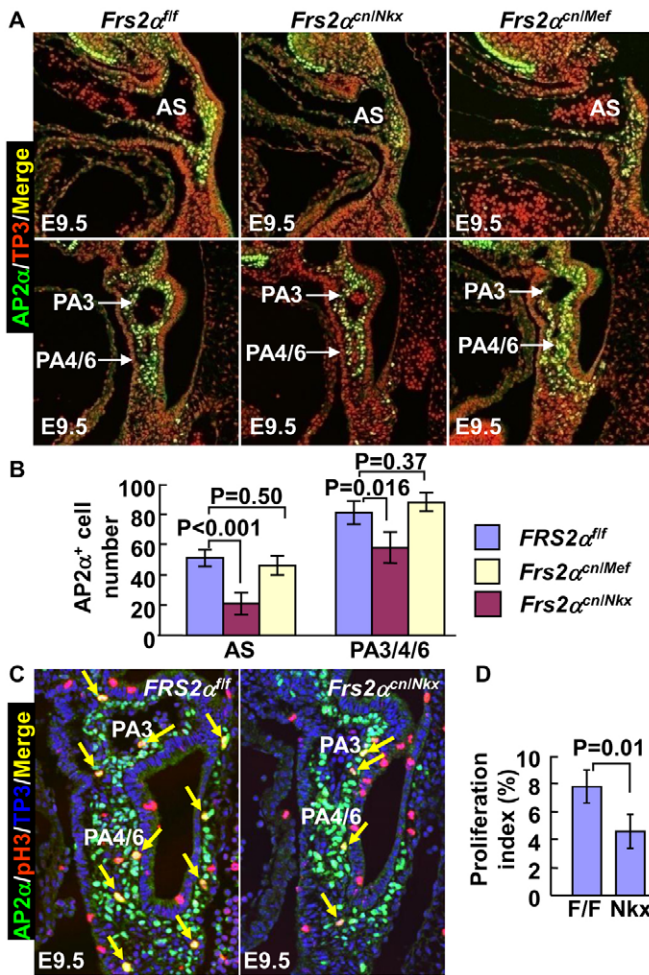

**Fig. 5. Compromised NCC contribution to the *FRS2 $\alpha$ <sup>cn/Nkx</sup>* OFT cushions.** (A) Immunostaining with anti-AP2 $\alpha$  antibody reveals reduced numbers of migrating NCCs in the aortic sac (AS) and in pharyngeal arches (PAs) 3 and 4/6 in *FRS2 $\alpha$ <sup>cn/Nkx</sup>*, but not in *FRS2 $\alpha$ <sup>cn/Mef</sup>*, mouse embryos at E9.5. (B) The numbers of AP2 $\alpha$ <sup>+</sup> cells in the aortic sac and in pharyngeal arches 3 and 4/6 as scored from five individuals (mean  $\pm$  s.d.). (C) Co-immunostaining reveals that proliferation of cardiac NCCs is compromised in *FRS2 $\alpha$ <sup>cn/Nkx</sup>* embryos. Proliferating cells are labeled with anti-phosphorylated histone H3 antibody (red), NCCs with anti-AP2 $\alpha$  antibody (green) and nuclei with To-Pro3 (blue). Triple-positive cells are indicated by arrows. (D) Statistical analyses of proliferating cardiac NCCs from five individuals (mean  $\pm$  s.d.).

### Ablation of both *Fgfr1* and *Fgfr2* phenocopies the *FRS2 $\alpha$* -deficiency in OFT morphogenesis

Among the four FGF receptors, *Fgfr1* and *Fgfr2* are broadly expressed in the pharyngeal region at E8.5 and *Fgfr3* is only expressed in pharyngeal arch 1 (Trokovic et al., 2005; Wright et al., 2003). At E9.5, *Fgfr2* expression persists in the PE and SM. At the same stage, *Fgfr1* was expressed in the PE, but not in the SM (Fig. 7A and see Fig. S7 in the supplementary material). To test whether FGFR1 and FGFR2 synergistically regulate OFT development, we conditionally inactivated *Fgfr1* and *Fgfr2*, individually or simultaneously, using *Nkx2.5<sup>Cre</sup>*; these were denoted *Fgfr1<sup>cn/Nkx</sup>*, *Fgfr2<sup>cn/Nkx</sup>* and *Fgfr1/r2<sup>cn/Nkx</sup>*, respectively. Histological analyses showed that *Fgfr1<sup>cn/Nkx</sup>* embryos had no obvious OFT defects, whereas both *Fgfr2<sup>cn/Nkx</sup>* and *Fgfr1/r2<sup>cn/Nkx</sup>* mutants often developed

OA and DORV (Table 3, Fig. 7B). In addition, *Fgfr1/r2<sup>cn/Nkx</sup>* double mutants also exhibited the PTA phenotype (Fig. 7). Similar to our findings in *FRS2 $\alpha$ <sup>cn/Nkx</sup>* mutant OFTs, both the proximal and distal segments of *Fgfr1/r2<sup>cn/Nkx</sup>* OFT cushions were hypocellular (Fig. 8A). Immunostaining revealed sustained PECAM expression in cushion cells, increased VEGFA expression in the OFT myocardium, and reduced AP2 $\alpha$ <sup>+</sup> cell proliferation in the aortic sac and pharyngeal arches in *Fgfr1/r2<sup>cn/Nkx</sup>* double mutants (Fig. 8B,C). The finding that *Fgfr1/r2<sup>cn/Nkx</sup>* and *FRS2 $\alpha$ <sup>cn/Nkx</sup>* mutants had similar defects in endocardial EMT and NCC contribution suggested that FGFR1 and FGFR2 redundantly regulate OFT remodeling via *FRS2 $\alpha$* -dependent pathways. In addition, *Fgfr1/r2<sup>cn/Nkx</sup>* embryos also exhibited reduced total and proliferating ISL1<sup>+</sup> cell numbers and compromised activation of the MAP kinase, but not AKT, pathway (Fig. 8D), indicating that the FGFR1/2-*FRS2 $\alpha$* -MAP kinase signaling axis in the SM is required for regulating the accrual of SHF cells to the OFT myocardium.

Furthermore, the absence of OFT phenotypes in *Fgfr1<sup>cn/Nkx</sup>* and all mutants carrying one conditional null allele indicates that the aforementioned defects of *FRS2 $\alpha$ <sup>cn/Nkx</sup>*, *Fgfr2<sup>cn/Nkx</sup>*, or *Fgfr1/r2<sup>cn/Nkx</sup>* mutants are not caused by *Nkx2.5* heterozygosity because all these mutants had one *Nkx2.5*-null allele owing to the *Cre* knock-in.

### DISCUSSION

Here we report that *FRS2 $\alpha$* -mediated signaling pathways in OFT myocardial precursor cells that reside in the SHF are required for normal expansion and deployment of these cells to the OFT myocardium. These *FRS2 $\alpha$* -mediated pathways are also required to indirectly regulate endocardial EMT and the recruitment of NCCs into the OFT cushions. Ablation of *FRS2 $\alpha$*  in the SHF compromised MAP kinase activation and caused OFT alignment and septation defects. Our results are consistent with those presented in a companion study (Park et al., 2008), in which disrupting FGF signaling either by ablation of *Fgfr1* and *Fgfr2*, or by overexpression of the FGF antagonist sprouty 2 (*Spry2*), in the SHF causes arterial pole defects. *FRS2 $\alpha$ <sup>cn/Nkx</sup>* hearts also exhibited defects in the atria and ventricles. This report focuses on the OFT defects.

### Role of *FRS2 $\alpha$* in mediating FGF signals for OFT morphogenesis

Among the 22 FGF homologs, *Fgf8* and *Fgf10* are expressed in the SHF (Ilagan et al., 2006; Kelly et al., 2001; Park et al., 2006). Deficient or excessive FGF8 results in abnormal SHF development and OFT defects in a dosage- and spatiotemporal-specific manner (Hutson et al., 2006; Ilagan et al., 2006; Park et al., 2006). Ablation of *Fgf10* results in mispositioning of the heart in the thoracic cavity (Marguerie et al., 2006). Although *Fgf15* is expressed in the PE, it is unclear whether this mesodermal domain in the pharyngeal arches includes the SHF (Vincentz et al., 2005); loss of *Fgf15* also causes OFT alignment defects. The OFT hypoplasia and misalignment we observed after ablation of *FRS2 $\alpha$*  in the SHF are consistent with the requirements for these ligands during OFT morphogenesis and with the report that ablation of the *Fgfr2IIIb* isoform causes OFT alignment and ventricular septal defects (VSDs) (Marguerie et al., 2006). Ablation of *Fgf8* function in heart precursors while they still reside in the primitive streak prevents formation of the OFT and right ventricle (Park et al., 2006). However, we did not observe this after ablation of *FRS2 $\alpha$*  with *Nkx2.5<sup>Cre</sup>*, suggesting either that the onset of *Nkx2.5<sup>Cre</sup>* is too late to disrupt transduction of the FGF8 signals that regulate the earliest phases of SHF development, or that these early signals are not *FRS2 $\alpha$* -dependent. In addition, ablation of

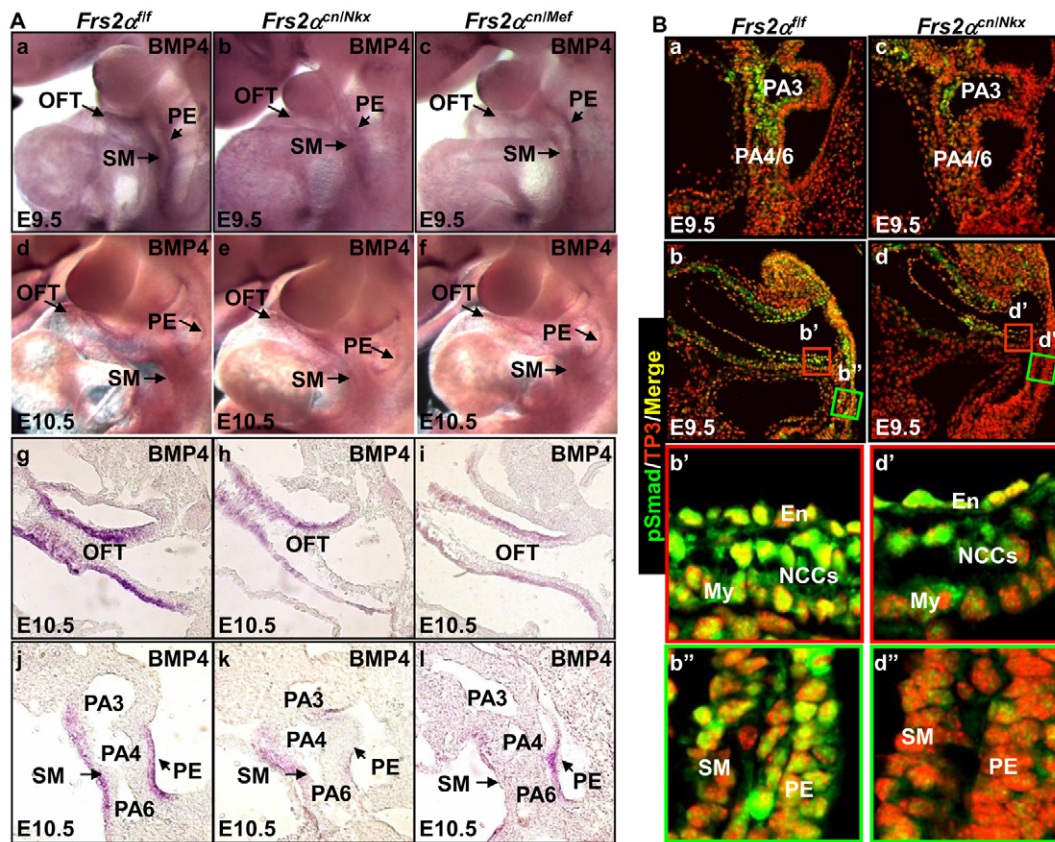

**Fig. 6. Compromised BMP4 signaling in *Frs2α* mutant embryos.** (A) Whole-mount in situ hybridization with antisense *Bmp4* probe on E9.5 (a-c) or E10.5 (d-f) mouse embryos. Sections (g-l) confirm the decreased *Bmp4* expression in the *Frs2α*<sup>cn</sup> OFT and pharyngeal arches. (B) Phosphorylated SMAD1/5/8 expression assessed in E9.5 embryos. High-magnification views of boxed areas in b, d are shown in b', b'', d', d'', as indicated.

*Fgf8* with *Nkx2.5*<sup>Cre</sup> also results in a significant loss of the *Nkx2.5*<sup>Cre</sup> lineage and in severe OFT and right ventricle truncation by E9.5. *Fgf8*; *Nkx2.5*<sup>Cre</sup> mutants have significant decreases in cell proliferation and increases in cell death in both the PE and SM (Ilagan et al., 2006). Although *Frs2α*<sup>cn/Nkx</sup> mutants also had a significant decrease in cell proliferation in the PE and SM, no increase in cell death was found associated with *Frs2α*<sup>cn/Nkx</sup>. Thus, the FGF8 signals that promote SHF cell proliferation are likely to be mediated via FRS2α, and those that prevent cell death in these two domains are likely to be elicited via FRS2α-independent pathways.

Here we show that ablation of *Frs2α* significantly reduced SHF cell proliferation (by 50%), as reflected in the shortened OFT. A similar correlation between compromised proliferation, shortened OFTs and disrupted OFT alignment and rotation has been reported elsewhere (Ilagan et al., 2006; Park et al., 2006). In addition, because *Frs2α* ablation did not prevent all SHF cell proliferation, it is likely that other signaling pathways are also involved. It has been shown that Wnt signaling can regulate SHF cell proliferation via both FGF-dependent and FGF-independent pathways (Cohen et al., 2007; Lin, L. et al., 2007). Therefore, further efforts are needed to clarify this issue. No heart misposition phenotype was observed in *Frs2α*<sup>cn</sup> embryos, implying that FGF10 regulates heart position independently of FRS2α-mediated signaling, although the data do not rule out the possibility that *Nkx2.5*<sup>Cre</sup> and *Mef2c*<sup>Cre</sup> are not expressed in the cells that regulate heart position.

In mice, *Fgf8* deficiency phenocopies syndromes associated with 22q11 deletions in humans, which are characterized by cardiovascular, thymic, parathyroid and craniofacial defects (Frank et al., 2002; Vitelli et al., 2002), and *Fgf8* modifies the vascular phenotypes resulting from *Tbx1* haploinsufficiency (Vitelli et al., 2006). Furthermore, loss of *Crkl* function, another gene in the 22q11 deletion that contributes the human phenotypes, disrupts phosphorylation of FRS2α downstream of FGF8/FGFR interactions (Guris et al., 2001; Moon et al., 2006). Our new findings implicate FRS2α-mediated signaling as a molecular mechanism underlying the cardiovascular features in these mouse models and, possibly, in affected humans. Moreover, our data uncover branchpoints in the downstream effector pathways that mediate distinct aspects of FGF signaling.

### FRS2α-mediated signals secondarily regulate EMT and NCC contribution during cardiac OFT cushion formation

The process of endocardial EMT generates a subset of the OFT cushion mesenchymal cells and is regulated both by autonomous signals within the endocardium and by paracrine signals from the myocardium (Armstrong and Bischoff, 2004). We have shown that expression of *Bmp4*, which is required in the myocardium for EMT (J.F.M., unpublished) and NCC invasion (Liu et al., 2004), is decreased in response to *Frs2α* ablation in the SHF. We further demonstrate that *Frs2α* function is essential for the suppression of VEGFA expression in the myocardium. Myocardial NFATC2/3/4



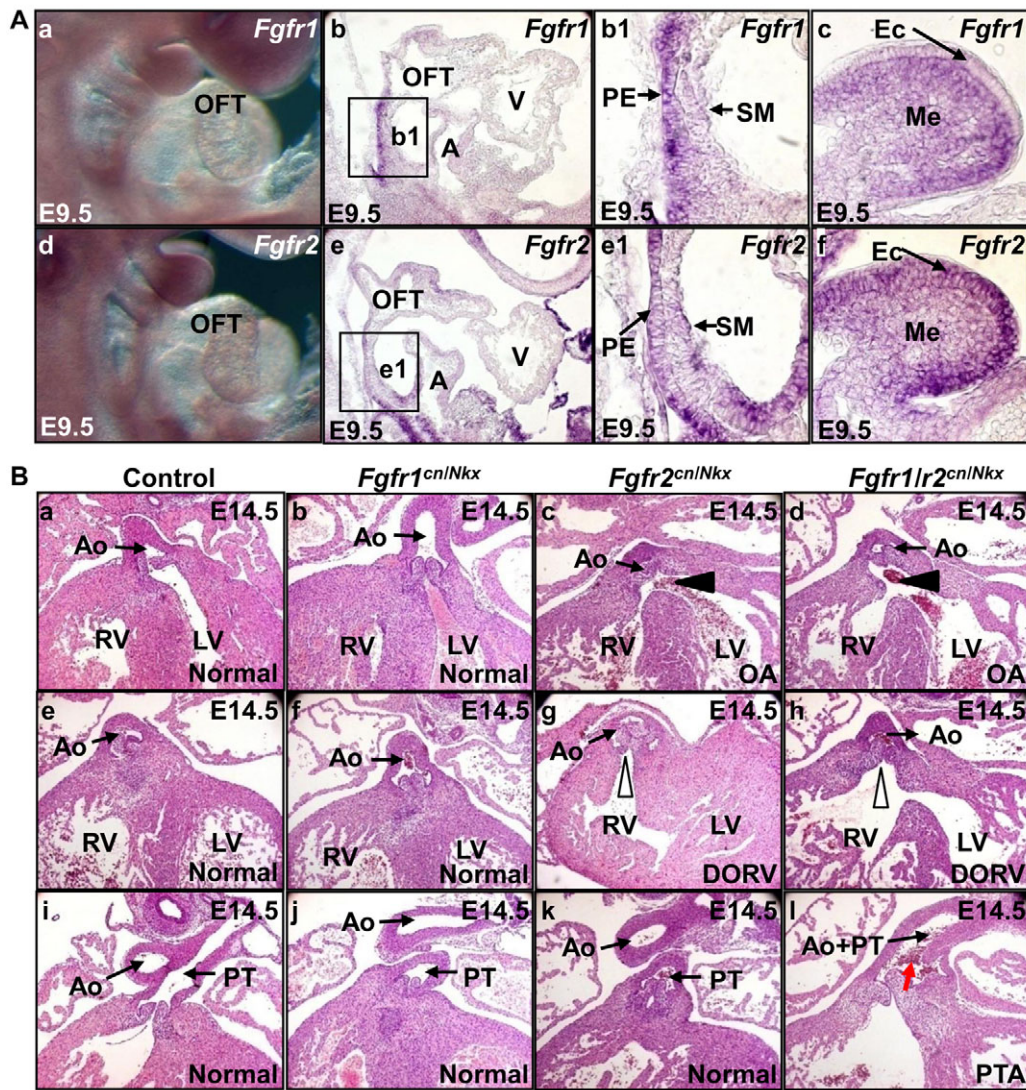

**Fig. 7. OFT defects in *Fgfr1* and *Fgfr2* double conditional-null embryos.** (A) Whole-mount in situ hybridization demonstrating *Fgfr1* (a) and *Fgfr2* (d) expression in E9.5 mouse embryos. Cryosections reveal detailed expression patterns of *Fgfr1* (b,c) and *Fgfr2* (e,f). b1 and e1 are higher magnification views of b and e, respectively. (B) H&E staining of E14.5 embryo sections demonstrates that both *Fgfr2* conditional mutant and *Fgfr1/Fgfr2* (*Fgfr1lr2*) double conditional mutants have ventricular septal defects (VSDs) (g,h) and DROV (c,d,h), that *Fgfr1/Fgfr2* have PTA (l), and *Fgfr1* mutants have normal OFTs (b,f,j). Black arrowheads denote OA-associated VSDs, white arrowheads denote DROV, and the red arrow denotes PTA.

promote EMT by suppressing VEGFA expression (Chang et al., 2004). Furthermore, the transcriptional activity of NFATC2/3/4 can be regulated by MAP kinase and PI3K/AKT pathways downstream of the FGF signaling axis (Macian, 2005). Indeed, ablation of *Frs2 $\alpha$*  in mouse embryonic fibroblasts blocked NFAT transcriptional activity in response to FGF stimulation (Fig. 4F). In the accompanying report, Park and colleagues show that soluble factors from wild-type OFT can rescue EMT defects in ex vivo cultured *Fgf8* mutant OFTs (Park et al., 2008).

*Nkx2.5<sup>Cre</sup>* is homogeneously expressed in the OFT endocardium, whereas *Mef2c<sup>Cre</sup>* is mosaically expressed in this domain. However, we ruled out a requirement for *Frs2 $\alpha$*  in the endocardium during EMT because ablating *Frs2 $\alpha$*  with *Tie2<sup>Cre</sup>* did not disrupt EMT. Together, our data suggest that the FGF signaling axis promotes endocardial EMT by promoting *Bmp4* expression and suppressing myocardial VEGFA production via an FRS2 $\alpha$ -MAP kinase-NFATC pathway.

Although *Nkx2.5<sup>Cre</sup>* is not expressed in NCCs, ablation of *Fgfr1/Fgfr2* or *Frs2 $\alpha$*  with *Nkx2.5<sup>Cre</sup>* reduced the NCC contribution to the OFT cushions. Notably, ablation of *Frs2 $\alpha$*  in NCCs with *Wnt1-Cre* did not cause OFT defects (data not shown). Park and colleagues also demonstrate that ablation of FGF receptors or overexpression of the FGFR antagonist *Spry2* in the SHF, but not in NCCs, also suppresses NCC invasion of the OFT cushions (Park et al., 2008). Interestingly, suppression of the FGF signaling axis, either by ablation of *Fgf8*, *Fgfr1/2* or *Frs2 $\alpha$* , or by overexpression of *Spry2* (here and in the accompanying report), reduced the BMP expression in the SHF and PE that has been shown to be crucial for NCCs to contribute to the OFT cushion (Liu et al., 2004). Consistent with the expression pattern of *Nkx2.5<sup>Cre</sup>* and *Mef2c<sup>Cre</sup>*, *Frs2 $\alpha$ <sup>cn/Nkx</sup>* embryos had reduced *Bmp4* expression in both SM and PE, whereas *Frs2 $\alpha$ <sup>cn/Mef</sup>* only had reduced *Bmp4* expression in the SHF (Fig. 6A,j,l). Given the fact that *Mef2c<sup>Cre</sup>* is homogeneously expressed in

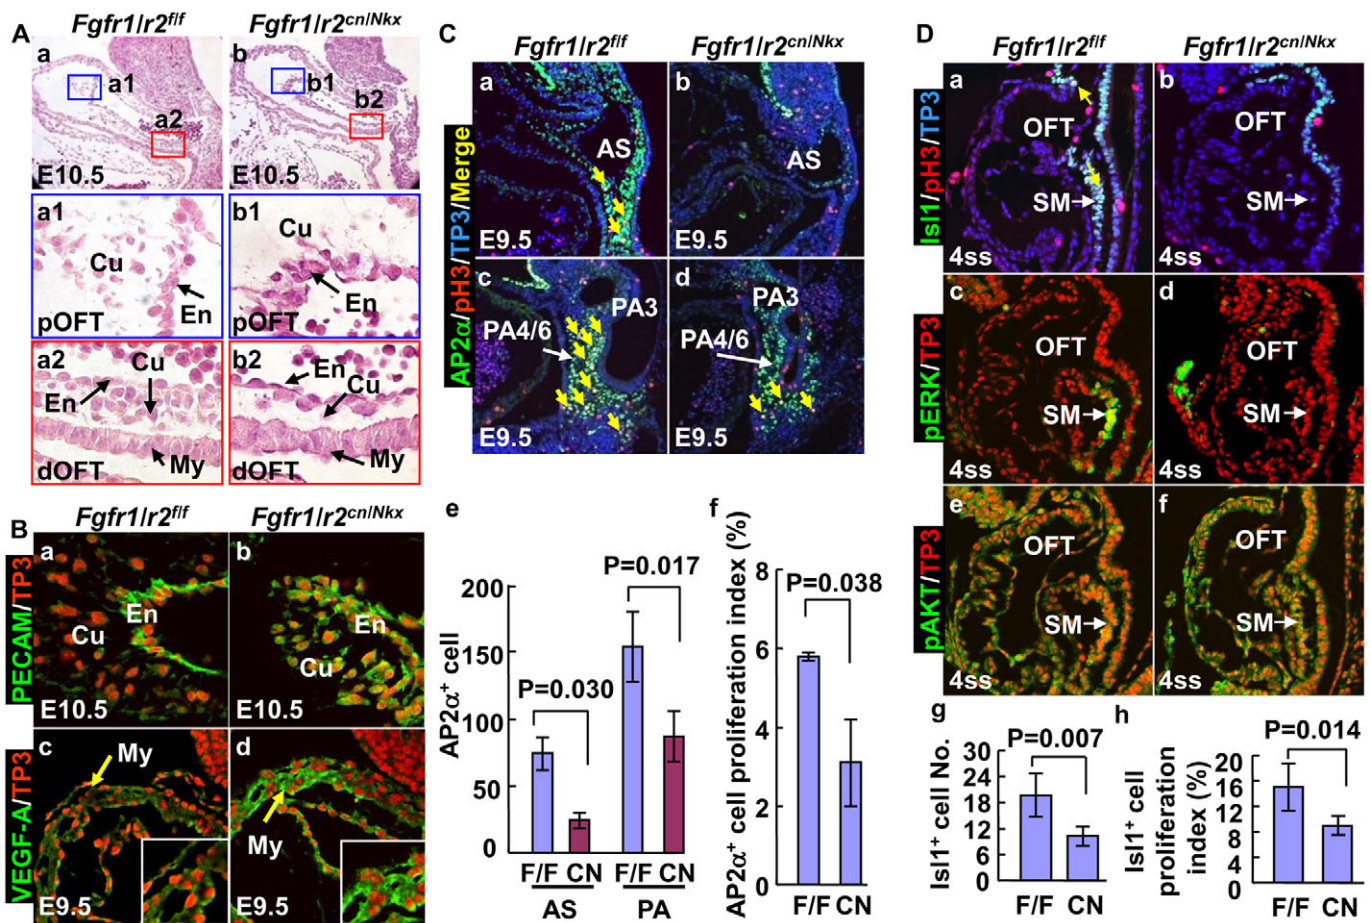

**Fig. 8. Double ablation of *Fgfr1/Fgfr2* disrupts OFT cushion formation.** (A) H&E staining of sagittal sections of E10.5 mouse OFTs. High-magnification views of the boxed areas in a,b representing proximal (p) and distal (d) OFT are shown in a1,a2,b1,b2. Note the reduced cellularity in both distal and proximal parts of mutant OFT cushions. (B) Compromised EMT in the *Fgfr1/Fgfr2* double ablation (*Fgfr1Ir2<sup>cn/Inkx</sup>*) OFT endocardium. Immunostaining reveals sustained PECAM expression in mutant OFT cushion cells (a,b) and increased VEGFA expression in the mutant OFT myocardium (c,d). Insets are high-magnification views of the same section. (C) Reduced proliferation of cardiac NCCs upon *Fgfr1/Fgfr2* double ablation. (a-d) Proliferating cells were labeled with anti-phosphorylated histone 3 (pH3, red), NCCs with anti-AP2 $\alpha$  antibody (green), and nuclei with To-Pro3 (blue). Triple-positive cells are indicated by arrows. (e,f) The number of AP2 $\alpha$  and triple-positive cells from four individuals (mean  $\pm$  s.d.). (D) (a-f) Embryos at the 4 ss stained with the indicated antibodies and To-Pro3 demonstrate that total and proliferating ISL1 $^{+}$  cells in the SHF are reduced in the mutants. Note that only MAP kinase, but not AKT, phosphorylation is compromised in the mutants. Yellow arrows indicate proliferating ISL1 $^{+}$  cells. (g,h) Total ISL1 $^{+}$  and proliferating ISL1 $^{+}$  cell numbers in the OFT and SM (mean  $\pm$  s.d.). F/F, *Fgfr1/Fgfr2* double-floxed embryos; CN, *Fgfr1/Fgfr2* double conditional-null mutants.

the SHF (Ai et al., 2007), the results suggest that early BMP4 signaling from both PE and SHF is required for NCC contribution to the OFT cushion. Together, these results indicate that the FGF8-FGFR/FRS2 $\alpha$  signaling axis in the SM and/or PE indirectly regulates NCC contribution to the OFT cushion via the BMP signaling axis.

In summary, we report that an FRS2 $\alpha$ -mediated FGF signaling pathway in the SHF and PE controls OFT extension and alignment by promoting the expansion of OFT precursors in the SHF, and also controls OFT septation by regulating OFT cushion formation through promoting the EMT of the cushion endocardium and NCC recruitment. Our findings provide a mechanism as to how the FGF signaling axis regulates OFT morphogenesis.

We thank Dr David M. Ornitz for the *Fgfr2*-floxed mice; Dr Juha Partanen for the *Fgfr1*-floxed mice; Dr Jeffery D. Molkentin for the NFAT reporter; Dr Wallace L. McKeehan, Ms Young Xu and Mary Cole for critical reading of the manuscript; and Kerstin McKeehan for excellent technical support. This work

was supported by Public Health Service Grants NIH-CA96824, AHA0655077Y from The American Heart Association and DAMD17-03-0014 from the US Department of Defense.

#### Supplementary material

Supplementary material for this article is available at <http://dev.biologists.org/cgi/content/full/135/21/3611/DC1>

#### References

- Aggarwal, V. S., Liao, J., Bondarev, A., Schimmang, T., Lewandoski, M., Locker, J., Shanske, A., Campione, M. and Morrow, B. E. (2006). Dissection of Tbx1 and Fgf interactions in mouse models of 22q11DS suggests functional redundancy. *Hum. Mol. Genet.* **15**, 3219-3228.
- Ai, D., Liu, W., Ma, L., Dong, F., Lu, M. F., Wang, D., Verzi, M. P., Cai, C., Gage, P. J., Evans, S. et al. (2006). Pitx2 regulates cardiac left-right asymmetry by patterning second cardiac lineage-derived myocardium. *Dev. Biol.* **296**, 437-449.
- Ai, D., Fu, X., Wang, J., Lu, M. F., Chen, L., Baldini, A., Klein, W. H. and Martin, J. F. (2007). Canonical Wnt signaling functions in second heart field to promote right ventricular growth. *Proc. Natl. Acad. Sci. USA* **104**, 9319-9324.

- Armstrong, E. J. and Bischoff, J. (2004). Heart valve development: endothelial cell signaling and differentiation. *Circ. Res.* **95**, 459-470.
- Avery, A. W., Figueroa, C. and Vojtek, A. B. (2007). UNC-51-like kinase regulation of fibroblast growth factor receptor substrate 2/3. *Cell Signal.* **19**, 177-184.
- Buckingham, M., Meilhac, S. and Zaffran, S. (2005). Building the mammalian heart from two sources of myocardial cells. *Nat. Rev. Genet.* **6**, 826-835.
- Cai, C. L., Liang, X., Shi, Y., Chu, P. H., Pfaff, S. L., Chen, J. and Evans, S. (2003). Isl1 identifies a cardiac progenitor population that proliferates prior to differentiation and contributes a majority of cells to the heart. *Dev. Cell* **5**, 877-889.
- Chang, C. P., Neilson, J. R., Bayle, J. H., Gestwicki, J. E., Kuo, A., Stankunas, K., Graef, I. A. and Crabtree, G. R. (2004). A field of myocardial-endothelial NFAT signaling underlies heart valve morphogenesis. *Cell* **118**, 649-663.
- Choi, K. Y., Kim, H. J., Lee, M. H., Kwon, T. G., Nah, H. D., Furuichi, T., Komori, T., Nam, S. H., Kim, Y. J., Kim, H. J. et al. (2005). Runx2 regulates FGf2-induced Bmp2 expression during cranial bone development. *Dev. Dyn.* **233**, 115-121.
- Cohen, E. D., Wang, Z., Lepore, J. J., Lu, M. M., Taketo, M. M., Epstein, D. J. and Morrisey, E. E. (2007). Wnt/beta-catenin signaling promotes expansion of Isl-1-positive cardiac progenitor cells through regulation of FGF signaling. *J. Clin. Invest.* **117**, 1794-1804.
- Danielian, P. S., Muccino, D., Rowitch, D. H., Michael, S. K. and McMahon, A. P. (1998). Modification of gene activity in mouse embryos in utero by a tamoxifen-inducible form of Cre recombinase. *Curr. Biol.* **8**, 1323-1326.
- Edmondson, D. G., Lyons, G. E., Martin, J. F. and Olson, E. N. (1994). Mef2 gene expression marks the cardiac and skeletal muscle lineages during mouse embryogenesis. *Development* **120**, 1251-1263.
- Enciso, J. M., Gratzinger, D., Camenisch, T. D., Canosa, S., Pinter, E. and Madri, J. A. (2003). Elevated glucose inhibits VEGF-A-mediated endothelial cushion formation: modulation by PECAM-1 and MMP-2. *J. Cell Biol.* **160**, 605-615.
- Eswarakumar, V. P., Lax, I. and Schlessinger, J. (2005). Cellular signaling by fibroblast growth factor receptors. *Cytokine Growth Factor Rev.* **16**, 139-149.
- Frank, D. U., Fotheringham, L. K., Brewer, J. A., Muglia, L. J., Tristani-Firouzi, M., Capocchi, M. R. and Moon, A. M. (2002). An Fgf8 mouse mutant phenocopies human 22q11 deletion syndrome. *Development* **129**, 4591-4603.
- Galli, D., Dominguez, J. N., Zaffran, S., Munk, A., Brown, N. A. and Buckingham, M. E. (2008). Atrial myocardium derives from the posterior region of the second heart field, which acquires left-right identity as Pitx2c is expressed. *Development* **135**, 1157-1167.
- Gotoh, N., Manova, K., Tanaka, S., Murohashi, M., Hadari, Y., Lee, A., Hamada, Y., Hiroe, T., Ito, M., Kurihara, T. et al. (2005). The docking protein FRS2alpha is an essential component of multiple fibroblast growth factor responses during early mouse development. *Mol. Cell Biol.* **25**, 4105-4116.
- Grego-Bessa, J., Luna-Zurita, L., del Monte, G., Bolos, V., Melgar, P., Arandilla, A., Garratt, A. N., Zang, H., Mukoyama, Y. S., Chen, H. et al. (2007). Notch signaling is essential for ventricular chamber development. *Dev. Cell* **12**, 415-429.
- Guris, D. L., Fantes, J., Tara, D., Druker, B. J. and Imamoto, A. (2001). Mice lacking the homologue of the human 22q11.2 gene CRKL phenocopy neurocristopathies of DiGeorge syndrome. *Nat. Genet.* **27**, 293-298.
- Hadari, Y. R., Gotoh, N., Kouhara, H., Lax, I. and Schlessinger, J. (2001). Critical role for the docking-protein FRS2 alpha in FGF receptor-mediated signal transduction pathways. *Proc. Natl. Acad. Sci. USA* **98**, 8578-8583.
- Hoch, R. V. and Soriano, P. (2006). Context-specific requirements for Fgfr1 signaling through Frs2 and Frs3 during mouse development. *Development* **133**, 663-673.
- Hutson, M. R. and Kirby, M. L. (2003). Neural crest and cardiovascular development: a 20-year perspective. *Birth Defects Res. C Embryo Today* **69**, 2-13.
- Hutson, M. R., Zhang, P., Stadt, H. A., Sato, A. K., Li, Y. X., Burch, J., Creazzo, T. L. and Kirby, M. L. (2006). Cardiac arterial pole alignment is sensitive to FGF8 signaling in the pharynx. *Dev. Biol.* **295**, 486-497.
- Ilagan, R., Abu-Issa, R., Brown, D., Yang, Y. P., Jiao, K., Schwartz, R. J., Klingensmith, J. and Meyers, E. N. (2006). Fgf8 is required for anterior heart field development. *Development* **133**, 2435-2445.
- Kelly, R. G., Brown, N. A. and Buckingham, M. E. (2001). The arterial pole of the mouse heart forms from Fgf10-expressing cells in pharyngeal mesoderm. *Dev. Cell* **1**, 435-440.
- Kisanuki, Y. Y., Hammer, R. E., Miyazaki, J., Williams, S. C., Richardson, J. A. and Yanagisawa, M. (2001). Tie2-Cre transgenic mice: a new model for endothelial cell-lineage analysis *in vivo*. *Dev. Biol.* **230**, 230-242.
- Kouhara, H., Hadari, Y. R., Spivak-Kroizman, T., Schilling, J., Bar-Sagi, D., Lax, I. and Schlessinger, J. (1997). A lipid-anchored Grb2-binding protein that links FGF-receptor activation to the Ras/MAPK signaling pathway. *Cell* **89**, 693-702.
- Lamers, W. H. and Moorman, A. F. (2002). Cardiac septation: a late contribution of the embryonic primary myocardium to heart morphogenesis. *Circ. Res.* **91**, 93-103.
- Larsson, H., Klint, P., Landgren, E. and Claesson-Welsh, L. (1999). Fibroblast growth factor receptor-1-mediated endothelial cell proliferation is dependent on the Src homology (SH) 2/SH3 domain-containing adaptor protein Crk. *J. Biol. Chem.* **274**, 25726-25734.
- Liao, J., Kochilas, L., Nowotschin, S., Arnold, J. S., Aggarwal, V. S., Epstein, J. A., Brown, M. C., Adams, J. and Morrow, B. E. (2004). Full spectrum of malformations in velo-cardio-facial syndrome/DiGeorge syndrome mouse models by altering Tbx1 dosage. *Hum. Mol. Genet.* **13**, 1577-1585.
- Lin, L., Cui, L., Zhou, W., Dufort, D., Zhang, X., Cai, C. L., Bu, L., Yang, L., Martin, J., Kemler, R. et al. (2007). Beta-catenin directly regulates Islet1 expression in cardiovascular progenitors and is required for multiple aspects of cardiogenesis. *Proc. Natl. Acad. Sci. USA* **104**, 9313-9318.
- Lin, Y., Zhang, J., Zhang, Y. and Wang, F. (2007). Generation of an FRS2alpha conditional null allele. *Genesis* **45**, 554-559.
- Lindsay, E. A., Vitelli, F., Su, H., Morishima, M., Huynh, T., Pramparo, T., Jurecic, V., Ogunrinu, G., Sutherland, H. F., Scambler, P. J. et al. (2001). Tbx1 haploinsufficiency in the DiGeorge syndrome region causes aortic arch defects in mice. *Nature* **410**, 97-101.
- Liu, W., Selever, J., Wang, D., Lu, M. F., Moses, K. A., Schwartz, R. J. and Martin, J. F. (2004). Bmp4 signaling is required for outflow-tract septation and branchial-arch artery remodeling. *Proc. Natl. Acad. Sci. USA* **101**, 4489-4494.
- Ma, L., Lu, M. F., Schwartz, R. J. and Martin, J. F. (2005). Bmp2 is essential for cardiac cushion epithelial-mesenchymal transition and myocardial patterning. *Development* **132**, 5601-5611.
- Macian, F. (2005). NFAT proteins: key regulators of T-cell development and function. *Nat. Rev. Immunol.* **5**, 472-484.
- Marguerie, A., Bajolle, F., Zaffran, S., Brown, N. A., Dickson, C., Buckingham, M. E. and Kelly, R. G. (2006). Congenital heart defects in Fgfr2-IIIb and Fgf10 mutant mice. *Cardiovasc. Res.* **71**, 50-60.
- McDougall, K., Kubu, C., Verdi, J. M. and Meakin, S. O. (2001). Developmental expression patterns of the signaling adapters FRS-2 and FRS-3 during early embryogenesis. *Mech. Dev.* **103**, 145-148.
- McKeehan, W. L., Wang, F. and Kan, M. (1998). The heparan sulfate-fibroblast growth factor family: diversity of structure and function. *Prog. Nucleic Acid Res. Mol. Biol.* **59**, 135-176.
- Mohammadi, M., Dionne, C. A., Li, W., Li, N., Spivak, T., Honegger, A. M., Jaye, M. and Schlessinger, J. (1992). Point mutation in FGF receptor eliminates phosphatidylinositol hydrolysis without affecting mitogenesis. *Nature* **358**, 681-684.
- Moon, A. M., Guris, D. L., Seo, J. H., Li, L., Hammond, J., Talbot, A. and Imamoto, A. (2006). Crkl deficiency disrupts Fgf8 signaling in a mouse model of 22q11 deletion syndromes. *Dev. Cell* **10**, 71-80.
- Moses, K. A., DeMayo, F., Braun, R. M., Reecy, J. L. and Schwartz, R. J. (2001). Embryonic expression of an Nkx2-5/Cre gene using ROSA26 reporter mice. *Genesis* **31**, 176-180.
- Ong, S. H., Goh, K. C., Lim, Y. P., Low, B. C., Klint, P., Claesson-Welsh, L., Cao, X., Tan, Y. H. and Guy, G. R. (1996). Suc1-associated neurotrophic factor target (SNT) protein is a major FGF-stimulated tyrosine phosphorylated 90-kDa protein which binds to the SH2 domain of GRB2. *Biochem. Biophys. Res. Commun.* **225**, 1021-1026.
- Ong, S. H., Guy, G. R., Hadari, Y. R., Laks, S., Gotoh, N., Schlessinger, J. and Lax, I. (2000). FRS2 proteins recruit intracellular signaling pathways by binding to diverse targets on fibroblast growth factor and nerve growth factor receptors. *Mol. Cell Biol.* **20**, 979-989.
- Ornitz, D. M. (2000). FGFs, heparan sulfate and FGFRs: complex interactions essential for development. *BioEssays* **22**, 108-112.
- Park, E. J., Ogden, L. A., Talbot, A., Evans, S., Cai, C. L., Black, B. L., Frank, D. U. and Moon, A. M. (2006). Required, tissue-specific roles for Fgf8 in outflow tract formation and remodeling. *Development* **133**, 2419-2433.
- Park, E. J., Watanabe, Y., Smyth, G., Miyagawa-Tomita, S., Meyers, E., Klingensmith, J., Camenisch, T., Buckingham, M. and Moon, A. M. (2008). An FGF autocrine loop initiated in second heart field mesoderm regulates morphogenesis at the arterial pole of the heart. *Development* **135**, 3599-3610.
- Peters, K. G., Marie, J., Wilson, E., Ives, H. E., Escobedo, J., Del Rosario, M., Mirda, D. and Williams, L. T. (1992). Point mutation of an FGF receptor abolishes phosphatidylinositol turnover and Ca<sup>2+</sup> flux but not mitogenesis. *Nature* **358**, 678-681.
- Rosamond, W., Flegel, K., Friday, G., Furie, K., Go, A., Greenlund, K., Haase, N., Ho, M., Howard, V., Kissela, B. et al. (2007). Heart disease and stroke statistics-2007 update: a report from the American Heart Association Statistics Committee and Stroke Statistics Subcommittee. *Circulation* **115**, e69-e171.
- Srivastava, D. (2006). Making or breaking the heart: from lineage determination to morphogenesis. *Cell* **126**, 1037-1048.
- Stottmann, R. W., Choi, M., Mishina, Y., Meyers, E. N. and Klingensmith, J. (2004). BMP receptor IA is required in mammalian neural crest cells for development of the cardiac outflow tract and ventricular myocardium. *Development* **131**, 2205-2218.

- Trokovic, N., Trokovic, R. and Partanen, J. (2005). Fibroblast growth factor signalling and regional specification of the pharyngeal ectoderm. *Int. J. Dev. Biol.* **49**, 797-805.
- Trokovic, R., Trokovic, N., Hernesniemi, S., Pirvola, U., Vogt Weisenhorn, D. M., Rossant, J., McMahon, A. P., Wurst, W. and Partanen, J. (2003). FGFR1 is independently required in both developing mid- and hindbrain for sustained response to isthmus signals. *EMBO J.* **22**, 1811-1823.
- Verzi, M. P., McCulley, D. J., De Val, S., Dodou, E. and Black, B. L. (2005). The right ventricle, outflow tract, and ventricular septum comprise a restricted expression domain within the secondary/anterior heart field. *Dev. Biol.* **287**, 134-145.
- Vincentz, J. W., McWhirter, J. R., Murre, C., Baldini, A. and Furuta, Y. (2005). Fgf15 is required for proper morphogenesis of the mouse cardiac outflow tract. *Genesis* **41**, 192-201.
- Vitelli, F., Taddei, I., Morishima, M., Meyers, E. N., Lindsay, E. A. and Baldini, A. (2002). A genetic link between Tbx1 and fibroblast growth factor signaling. *Development* **129**, 4605-4611.
- Vitelli, F., Zhang, Z., Huynh, T., Sobotka, A., Mupo, A. and Baldini, A. (2006). Fgf8 expression in the Tbx1 domain causes skeletal abnormalities and modifies the aortic arch but not the outflow tract phenotype of Tbx1 mutants. *Dev. Biol.* **295**, 559-570.
- Ward, C., Stadt, H., Hutson, M. and Kirby, M. L. (2005). Ablation of the secondary heart field leads to tetralogy of Fallot and pulmonary atresia. *Dev. Biol.* **284**, 72-83.
- Wright, T. J., Hatch, E. P., Karabagli, H., Karabagli, P., Schoenwolf, G. C. and Mansour, S. L. (2003). Expression of mouse fibroblast growth factor and fibroblast growth factor receptor genes during early inner ear development. *Dev. Dyn.* **228**, 267-272.
- Yamamoto, S., Yoshino, I., Shimazaki, T., Murohashi, M., Hevner, R. F., Lax, I., Okano, H., Shibuya, M., Schlessinger, J. and Gotoh, N. (2005). Essential role of Shp2-binding sites on FRS2alpha for corticogenesis and for FGF2-dependent proliferation of neural progenitor cells. *Proc. Natl. Acad. Sci. USA* **102**, 15983-15988.
- Yu, K., Xu, J., Liu, Z., Susic, D., Shao, J., Olson, E. N., Towler, D. A. and Ornitz, D. M. (2003). Conditional inactivation of FGF receptor 2 reveals an essential role for FGF signaling in the regulation of osteoblast function and bone growth. *Development* **130**, 3063-3074.
- Zhang, Y., McKeenan, K., Lin, Y., Zhang, J. and Wang, F. (2008). FGFR1 tyrosine phosphorylation regulates binding of FRS2alpha but not FRS2beta to the receptor. *Mol. Endocrinol.* **22**, 167-175.
